# Supplementary material for: Atmospheric vorticity sets the basin-scale circulation in Hudson Bay
Source: Oxford University Press journal article supplement (doi:10.1525/elementa.049), 2020-01-01
Supplement: supplemental_material_final.docx [file supplemental_material_final.docx]

**Supplemental material**

**Atmospheric vorticity sets the basin-scale circulation in Hudson Bay**

Igor A. Dmitrenko1,*, Paul G. Myers2, Sergei A. Kirillov1, David G. Babb1, Denis L. Volkov3,4, Jennifer V. Lukovich1, Ran Tao2, Jens K. Ehn1, Kevin Sydor5, and David G. Barber1

1Centre for Earth Observation Science, University of Manitoba, Winnipeg, Manitoba, Canada

2Department of Earth and Atmospheric Sciences, University of Alberta, Edmonton, Alberta, Canada

3Cooperative Institute for Marine and Atmospheric Studies, University of Miami, Miami, Florida, USA

4NOAA, Atlantic Oceanographic and Meteorological Laboratory, Miami, Florida, USA

5Manitoba Hydro, Winnipeg, Manitoba, Canada

*Corresponding author’s email: [igor.dmitrenko@umanitoba.ca](mailto:igor.dmitrenko@umanitoba.ca)

**List of Contents:**

**Figure S1. Sea level atmospheric pressure and simulated currents and sea surface heights for storm #1.**

(a–d) Sea level atmospheric pressure (hPa) for storm #1 (16–19 November 2016) and simulated top 30-m currents (arrows) and SSH in color shading (e) before and (f) during the storm on 16 November and 18 November 2016, respectively. (JPEG)

**Figure S2. Sea level atmospheric pressure and simulated currents and sea surface heights for storm #2.**

(a–d) Sea level atmospheric pressure (hPa) for storm #2 (7–10 December 2016) and simulated top 30-m currents (arrows) and SSH in color shading (e) before and (f) during the storm on 7 December and 9 December 2016, respectively. (JPEG)

**Figure S3. Sea level atmospheric pressure and simulated currents and sea surface heights for storm #3.**

(a–d) Sea level atmospheric pressure (hPa) for storm #3 (12–15 December 2016) and simulated top 30-m currents (arrows) and SSH in color shading (e) before and (f) during the storm on 12 December and 15 December 2016, respectively. (JPEG).

**Figure S4. Sea level atmospheric pressure and simulated currents and sea surface heights for storm #5.**

(a–d) Sea level atmospheric pressure (hPa) for storm #5 (19–22 March 2017) and simulated top 30-m currents (arrows) and SSH in color shading (e) before and (f) during the storm on 19 March and 21 March 2017, respectively. (JPEG)

**Figure S5. Sea level atmospheric pressure and simulated currents and sea surface heights for storm #7.**

(a–d) Sea level atmospheric pressure (hPa) for storm #7 (11–14 September 2017) and simulated top 30-m currents (arrows) and SSH in color shading (e) before and (f) during the storm on 10 September and 13 September 2017, respectively. (JPEG)


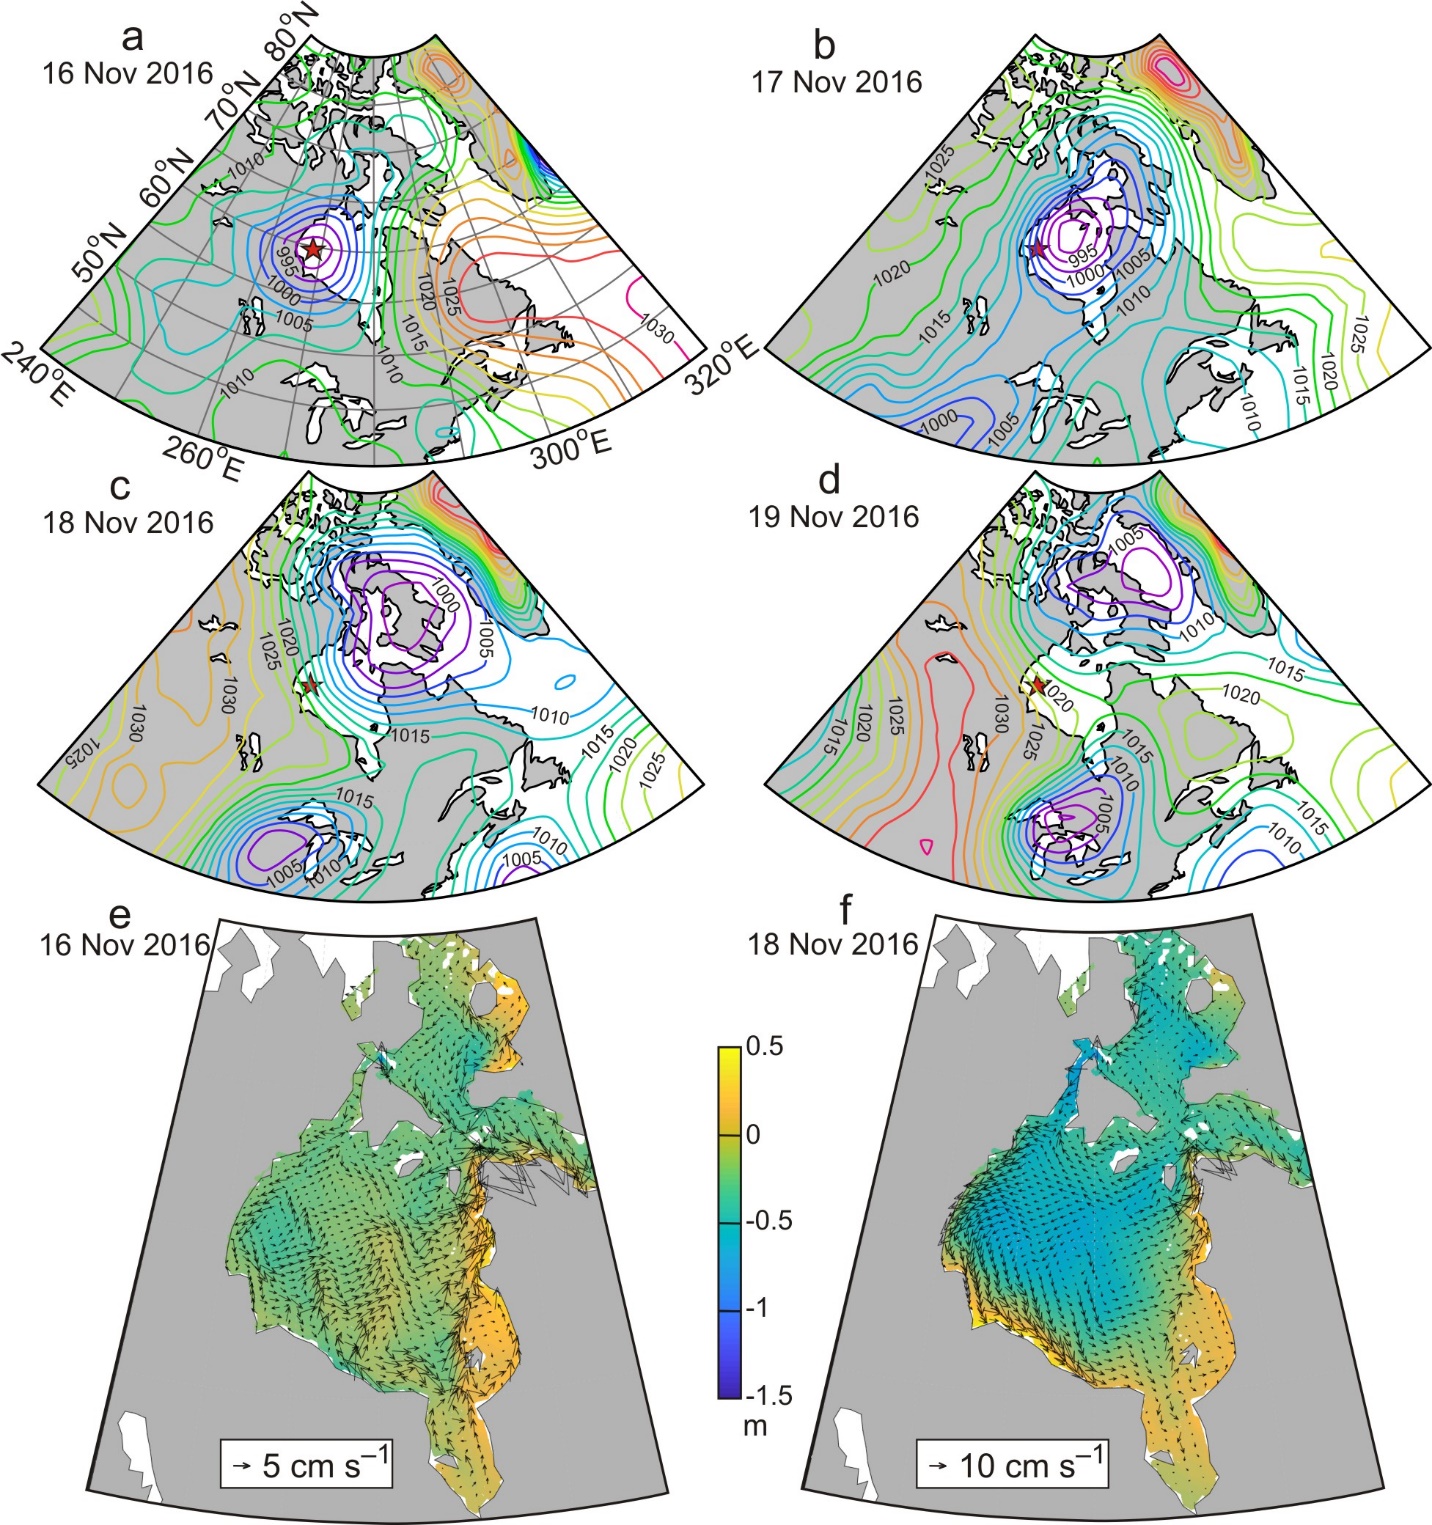


**Figure S1. Sea level atmospheric pressure and simulated currents and sea surface heights for storm #1.**

(a-d) Sea level atmospheric pressure (hPa) for storm #1 (16-19 November 2016) and simulated top 30 m currents (arrows) and SSH in color shading (e) before and (f) during the storm on 16 November and 18 November 2016, respectively.

**
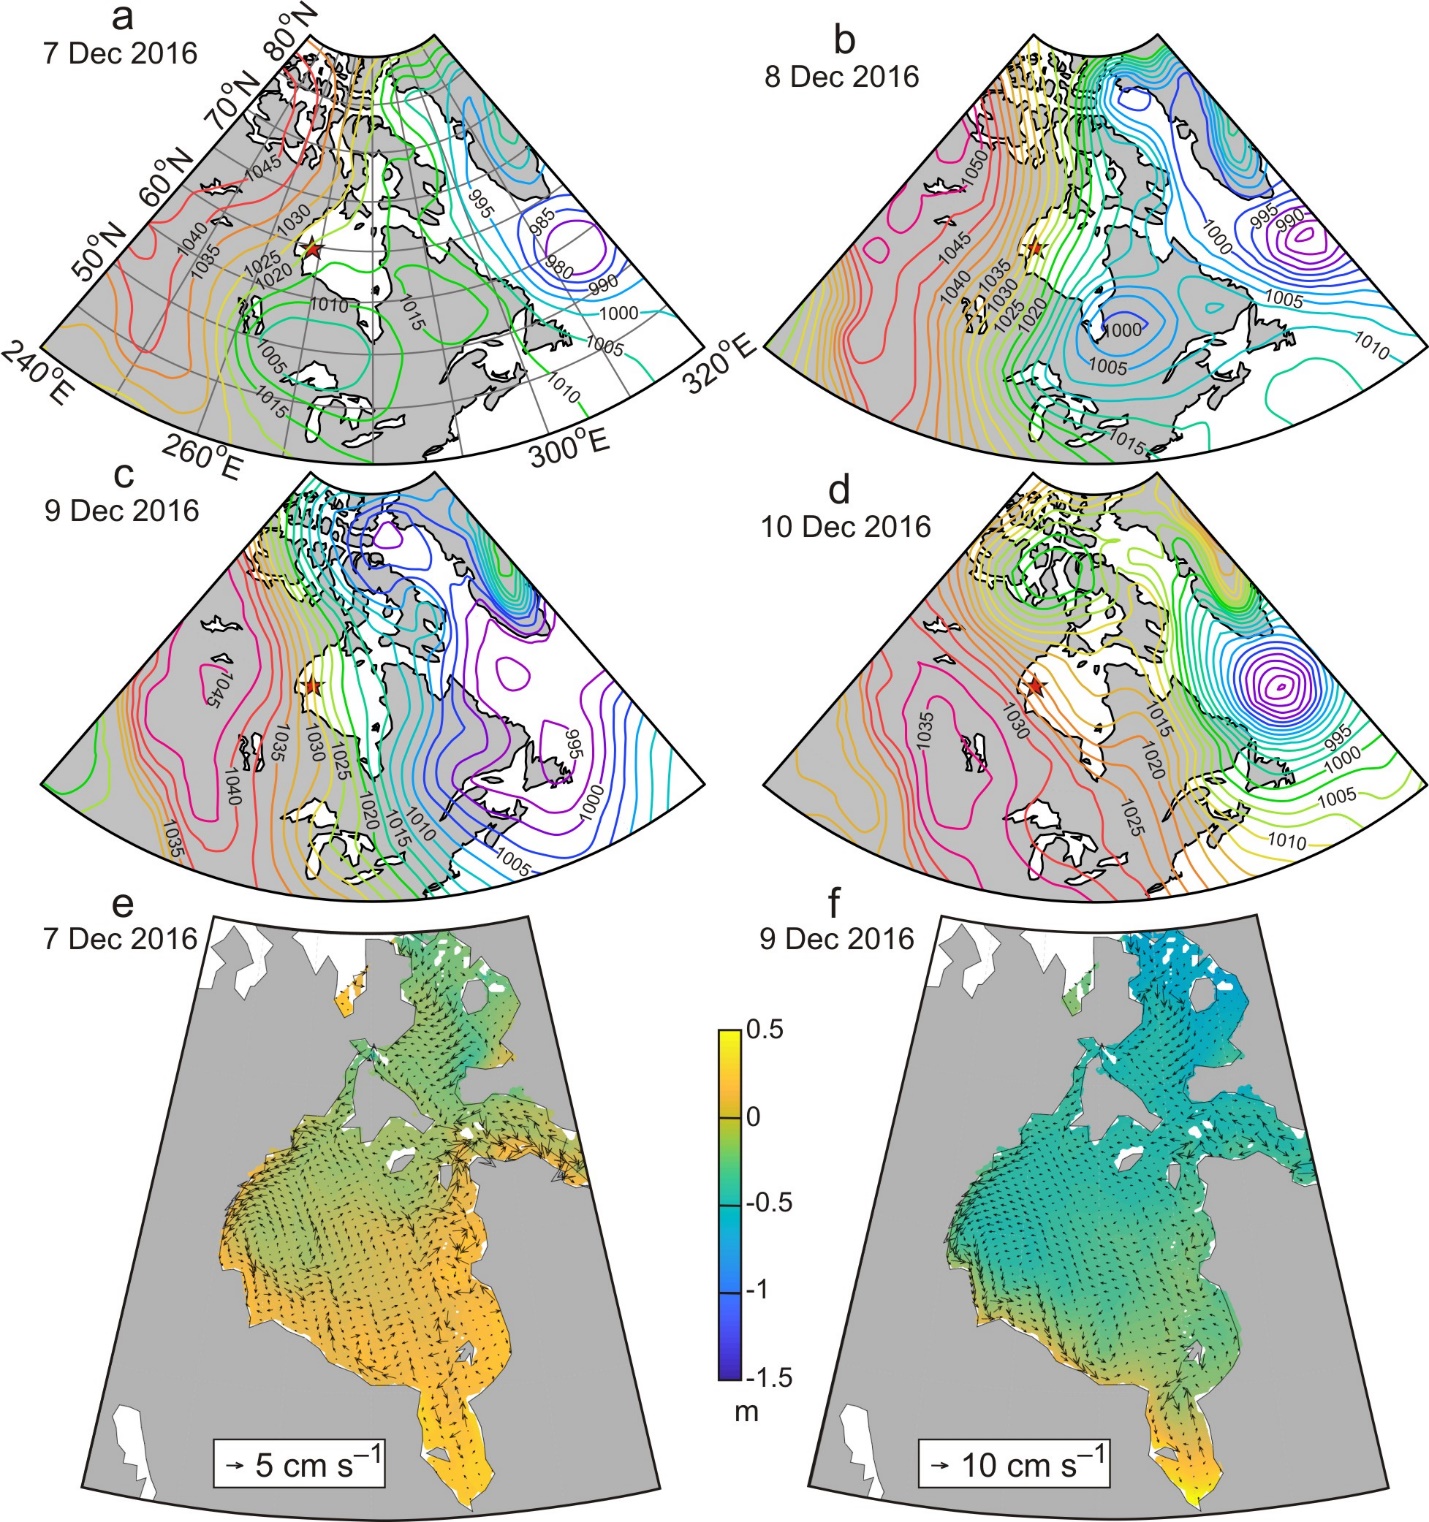
**

**Figure S2. Sea level atmospheric pressure and simulated currents and sea surface heights for storm #2.**

(a-d) Sea level atmospheric pressure (hPa) for storm #2 (7-10 December 2016) and simulated top 30 m currents (arrows) and SSH in color shading (e) before and (f) during the storm on 7 December and 9 December 2016, respectively.


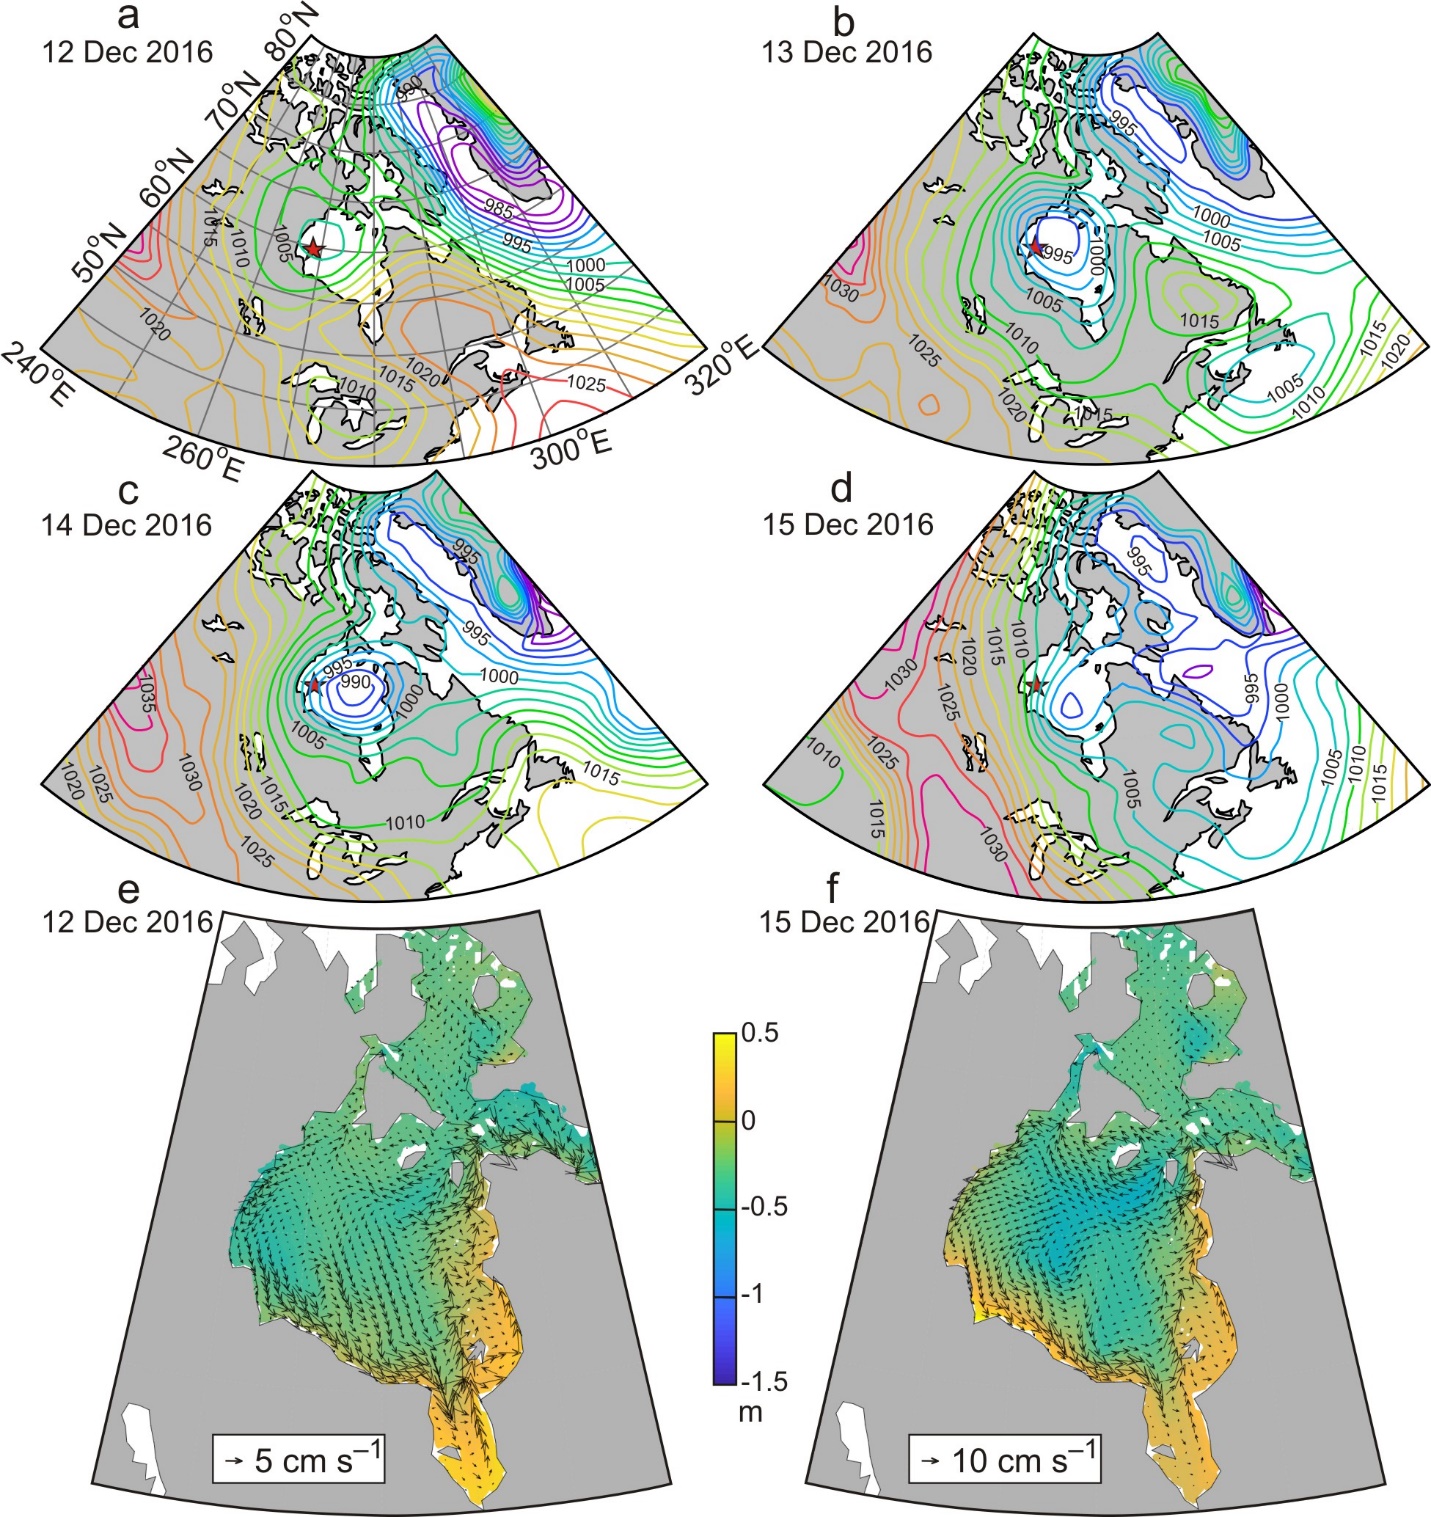


**Figure S3. Sea level atmospheric pressure and simulated currents and sea surface heights for storm #3.**

(a-d) Sea level atmospheric pressure (hPa) for storm #3 (12-15 December 2016) and simulated top 30 m currents (arrows) and SSH in color shading (e) before and (f) during the storm on 12 December and 15 December 2016, respectively.


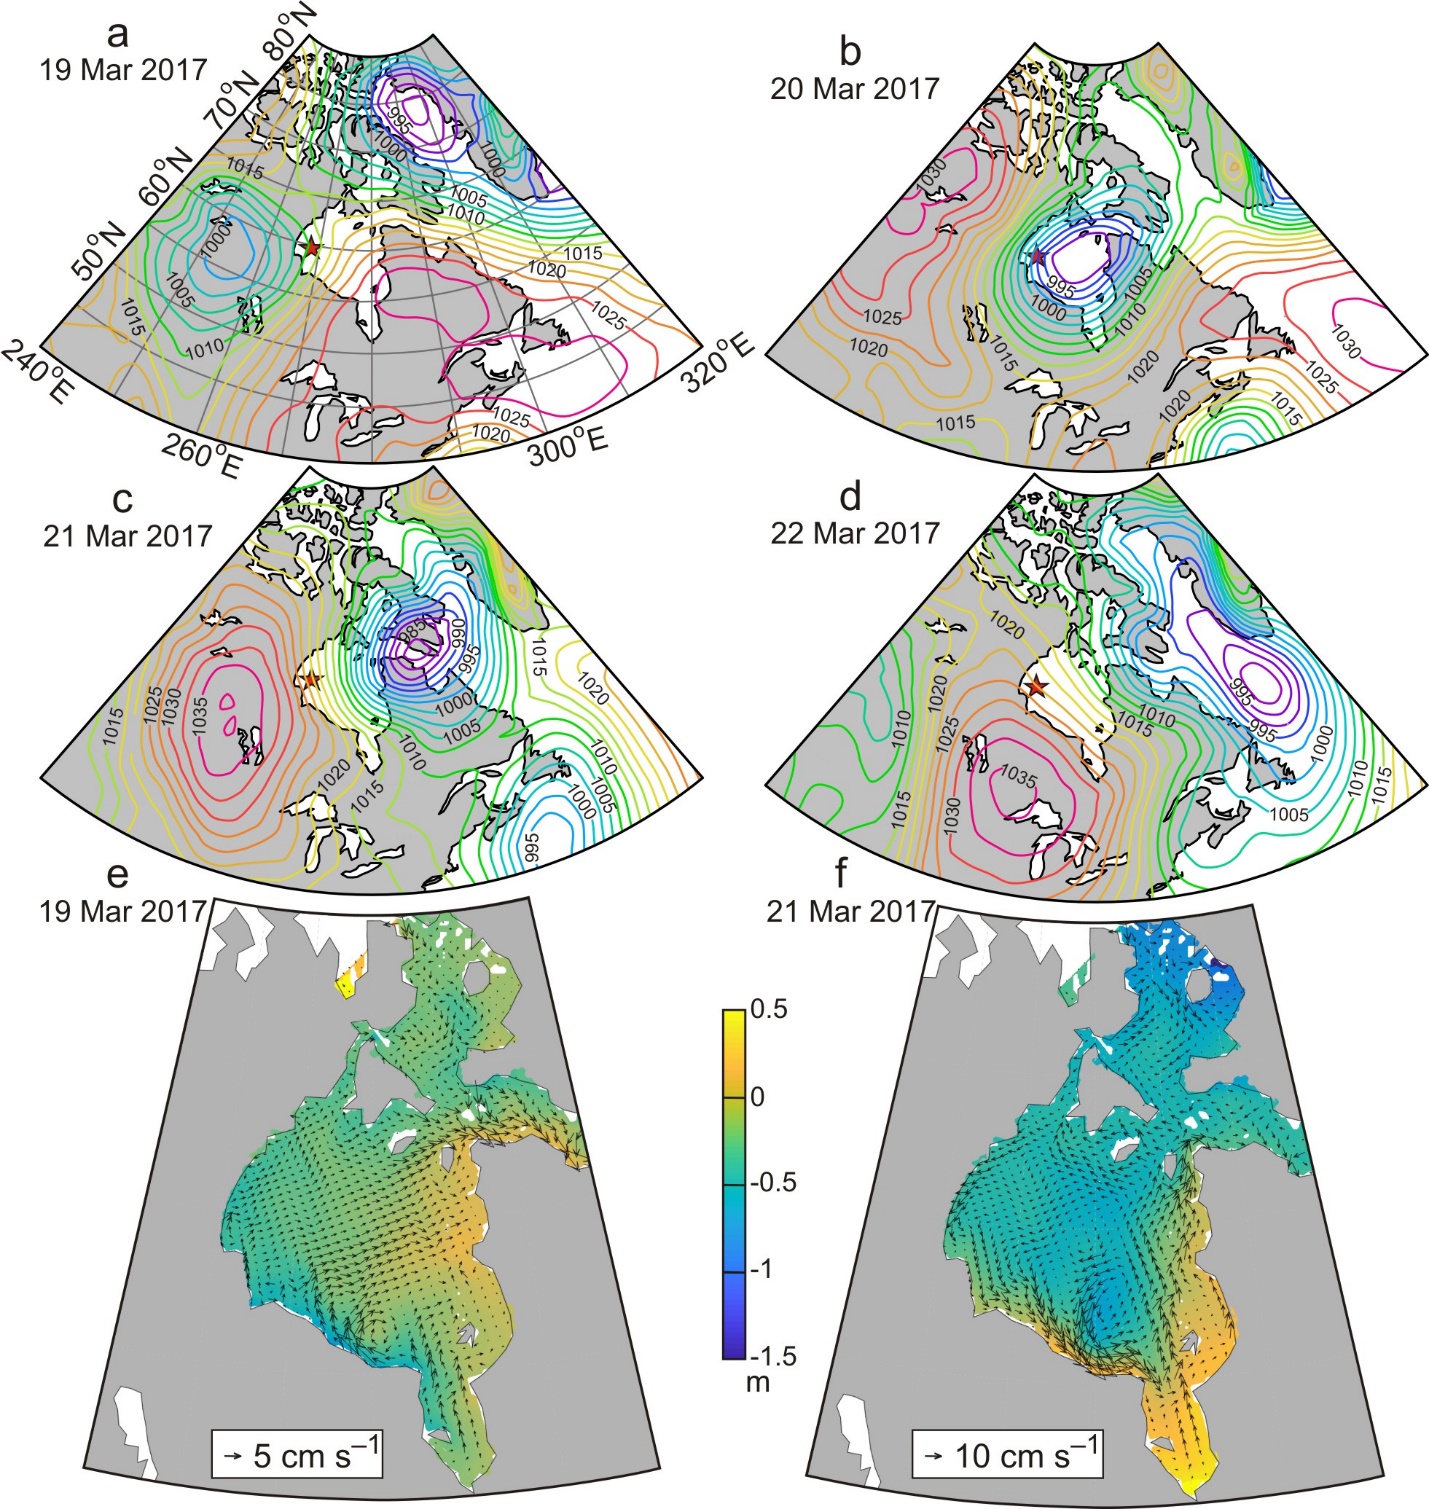


**Figure S4. Sea level atmospheric pressure and simulated currents and sea surface heights for storm #5.**

(a-d) Sea level atmospheric pressure (hPa) for storm #5 (19-22 March 2017) and simulated top 30 m currents (arrows) and SSH in color shading (e) before and (f) during the storm on 19 March and 21 March 2017, respectively.


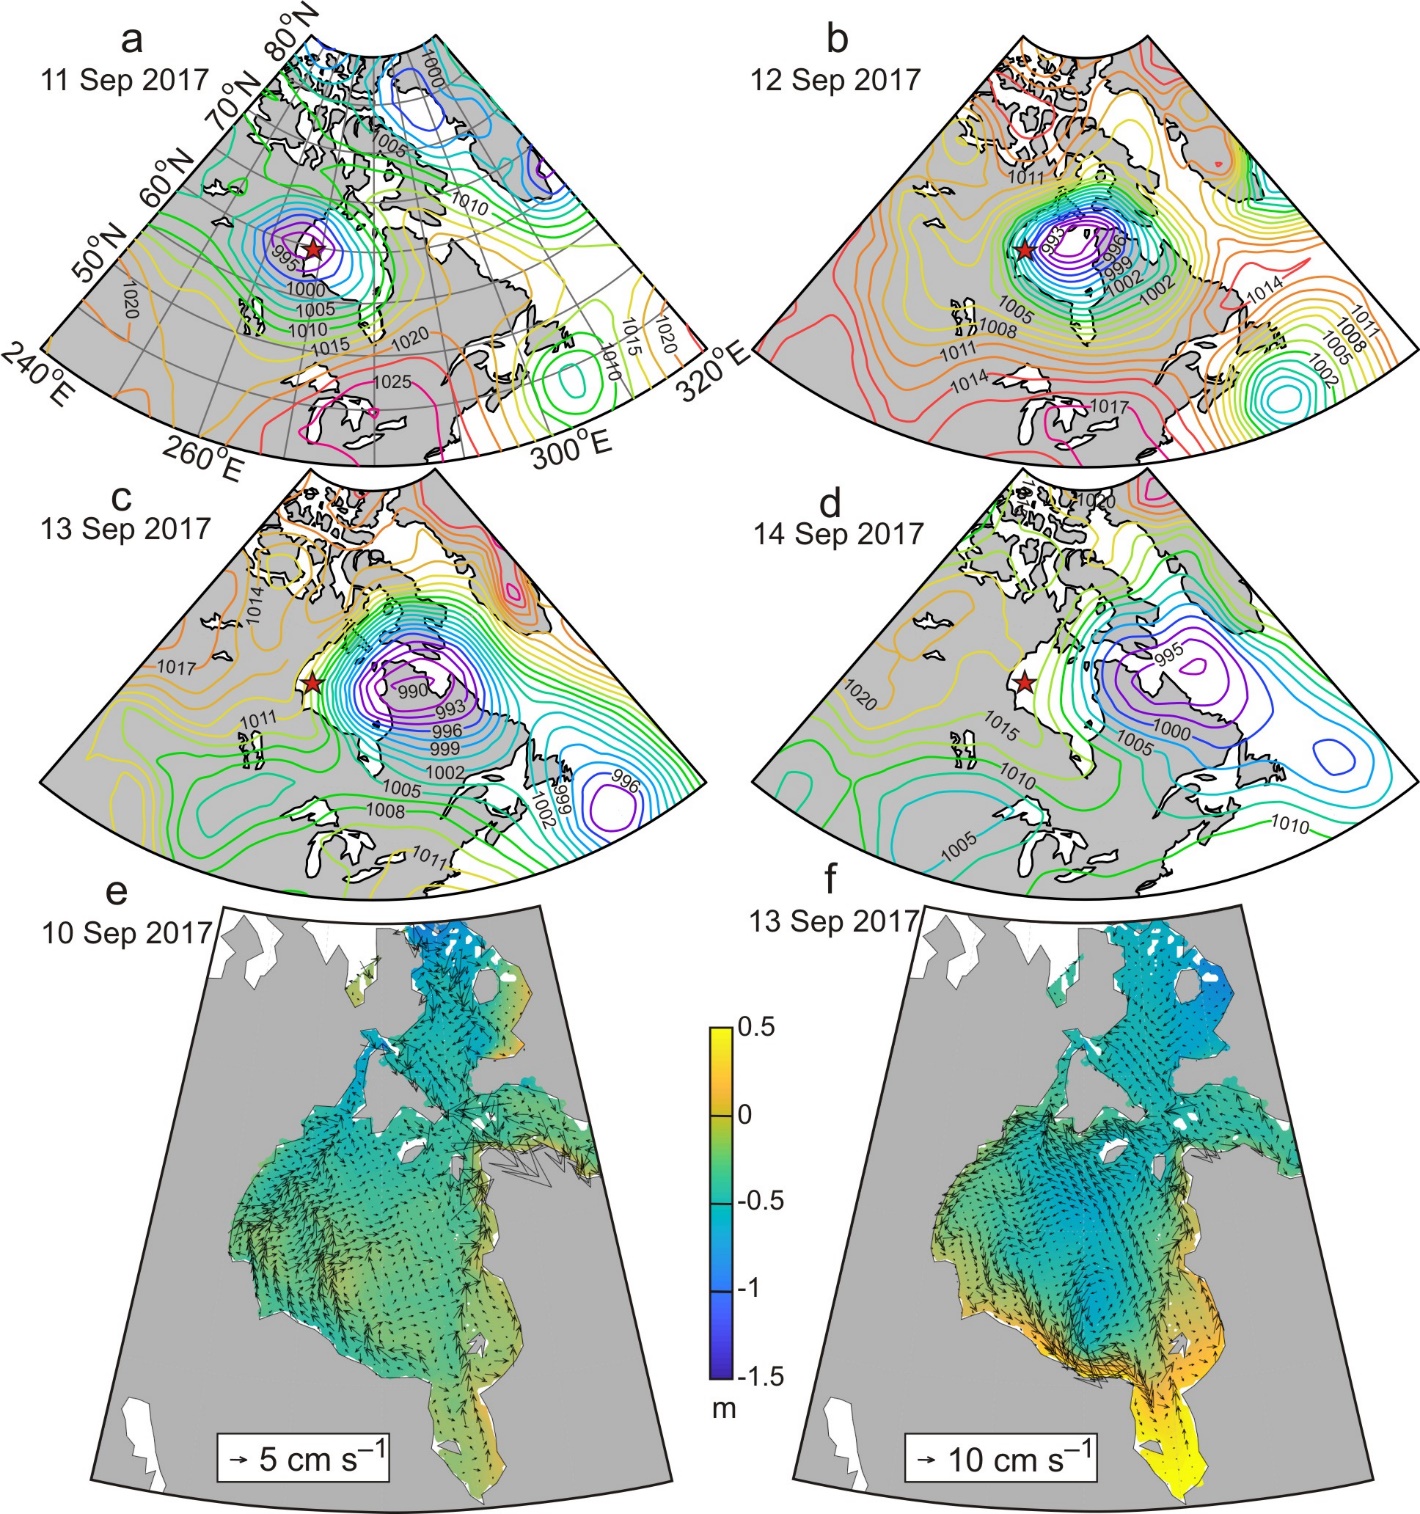


**Figure S5. Sea level atmospheric pressure and simulated currents and sea surface heights for storm #7.**

(a-d) Sea level atmospheric pressure (hPa) for storm #7 (11-14 September 2017) and simulated top 30 m currents (arrows) and SSH in color shading (e) before and (f) during the storm on 10 September and 13 September 2017, respectively.
